# Supplementary material
Source: HighWire-hosted journal article supplement (https://oem.bmj.com/content/suppl/2008/03/06/65.4.261)
Supplement: 654261webonlytable.pdf [file 654261webonlytable.pdf]

Table A : General characteristics by site

|                                           |           | French site (n=300) |            |            | Austrian site (n=130) |            |             |
|-------------------------------------------|-----------|---------------------|------------|------------|-----------------------|------------|-------------|
|                                           |           | Lung function       | Radiology  | Symptoms   | Lung function         | Radiology  | Symptoms    |
| All study subjects                        |           |                     |            |            |                       |            |             |
| Number by outcome                         | n (%)     | 244 (81%)           | 287 (96%)  | 289 (96%)  | 100 (77%)             | 101 (78%)  | 87 (67%)    |
| Men                                       | n (%)     | 218 (83%)           | 250 (95%)  | 252 (96%)  | 92 (82%)              | 93 (83%)   | 77 (69%)    |
| Women                                     | n (%)     | 26 (68%)            | 37 (97%)   | 37 (97%)   | 8 (44%)               | 8 (44%)    | 10 (56%)    |
| Age at inclusion <sup>1</sup>             | mean (sd) | 40.0 (8.7)          | 32.3 (8.6) | 41.1 (9.5) | 36.9 (8.2)            | 34.8 (8.1) | 38.7 (8.3)  |
| Smoking status at inclusion               |           |                     |            |            |                       |            |             |
| missing                                   | n         | -                   | -          | -          | 27                    | 9          | -           |
| Non smoker                                | n (%)     | 82 (34%)            | 111 (39%)  | 111 (38%)  | 36 (49%)              | 36 (39%)   | 31 (36%)    |
| Current smoker                            | n (%)     | 95 (39%)            | 140 (48%)  | 109 (38%)  | 24 (33%)              | 44 (48%)   | 34 (39%)    |
| Pack-years                                | mean (sd) | 19 (15)             | 12 (11)    | 20(15)     | 13 (10)               | 12 (9)     | 14 (10%)    |
| Ex-smoker                                 | n (%)     | 67 (27%)            | 36 (13%)   | 69 (24%)   | 13 (18%)              | 12 (13%)   | 22 (25%)    |
| All subjects with at least 2 examinations |           |                     |            |            |                       |            |             |
| Number by outcome                         | n (%)     | 205 (68%)           | 271 (90%)  | 158 (53%)  | 78 (60%)              | 88 (68%)   | 22 (17%)    |
| Duration of follow-up <sup>2</sup>        | mean (sd) | 8.1 (4.0)           | 13.4 (4.3) | 9.6 (2.1)  | 7.8 (1.6)             | 9.4 (3.3)  | 14.6 (0.1)  |
| in years                                  | min-max   | 0.5 – 14.8          | 1.4 – 24.7 | 1.6 – 14.8 | 4.0 – 9.7             | 4.0 – 14.3 | 14.2 – 14.7 |
| Number of measures                        | mean(sd)  | 5.5 (2.6)           | 3.2 (0.8)  | 2.8 (0.4)  | 2.9 (0.5)             | 3.1 (0.7)  | 2 (0.0)     |
|                                           | min-max   | 2 – 14              | 2 – 5      | 2 – 3      | 2 – 5                 | 2 – 4      | -           |
| Smoking status at the last follow-up      |           |                     |            |            |                       |            |             |
| Missing                                   |           | -                   | -          | -          | 27                    | 20         | -           |
| Non smoker                                | n (%)     | 82 (34%)            | 111 (39%)  | 111 (38%)  | 35 (48%)              | 35 (43%)   | 31 (36%)    |
| Current smoker                            | n (%)     | 67 (27%)            | 81 (28%)   | 82 (28%)   | 14 (19%)              | 22 (27%)   | 27 (31%)    |
| Pack-years                                | mean (sd) | 27 (17)             | 25 (17)    | 26(16)     | 15 (10)               | 15 (10)    | 16 (10)     |
| Ex-smoker                                 | n (%)     | 95 (39%)            | 95 (33%)   | 96 (33%)   | 24 (33%)              | 24 (30%)   | 29 (33%)    |

Table B Exposure characteristics before and during the longitudinal study period according to endpoint and site

|                                                                    |                                    | French site               |                            |                            | Austrian site             |                           |                            |
|--------------------------------------------------------------------|------------------------------------|---------------------------|----------------------------|----------------------------|---------------------------|---------------------------|----------------------------|
|                                                                    |                                    | Lung function             | Radiology                  | Symptoms                   | Lung function             | Radiology                 | Symptoms                   |
| At inclusion                                                       | (n)                                | 244                       | 287                        | 289                        | 100                       | 101                       | 87                         |
| Cumulative exposure at inclusion<br>in years.mg/m <sup>3</sup>     | <i>mean (sd)</i><br><i>min-max</i> | 60.9 (83.3)<br>0.0 –418.9 | 42.5 (76.4)<br>0.0 – 358.7 | 59.0 (81.4)<br>0.0 – 393.4 | 40.5 (43.7)<br>0.4 –259.9 | 38.9 (45.0)<br>0.4 –248.6 | 39.5 (50.4)<br>1.5 – 272.8 |
| Duration of exposure at inclusion<br>in years                      | <i>mean (sd)</i><br><i>min-max</i> | 15.6 (8.7)<br>0.0-40.2    | 7.8 (7.9)<br>0-36.5        | 16.6 (9.1)<br>0.0-36.7     | 13.5 (7.5)<br>1.0-32.9    | 11.3 (7.3)<br>0.8-32.1    | 15.4 (7.9)<br>0.5-39.9     |
| Mean exposure level before inclusion<br>in .mg/m <sup>3</sup>      | <i>mean (sd)</i><br><i>min-max</i> | 3.7 (4.4)<br>0.1-23.5     | 4.7 (6.5)<br>0.0-30.0      | 3.9 (4.8)<br>0.1-23.5      | 2.5 (1.8)<br>0.3-8.5      | 3.0 (2.5)<br>0.3-10.0     | 2.7 (2.7)<br>0.3-10.0      |
| Since inclusion                                                    | (n)                                | 205                       | 271                        | 158                        | 78                        | 88                        | 22                         |
| Cumulative exposure since inclusion*<br>in years.mg/m <sup>3</sup> | <i>mean (sd)</i><br><i>min-max</i> | 8.8 (9.1)<br>0.1 – 34.9   | 25.9 (31.7)<br>0.3 – 208.0 | 15.3 (8.3)<br>0.5 – 35.4   | 5.0 (2.8)<br>1.6 – 14.6   | 8.1 (6.5)<br>1.6 – 29.1   | 13.2 (6.5)<br>3.3 – 23.8   |
| Duration of follow-up in years*                                    | <i>mean (sd)</i><br><i>min-max</i> | 8.1 (4.0)<br>0.5-14.8     | 13.4 (4.3)<br>1.4-24.7     | 9.6 (2.1)<br>1.6-14.8      | 7.8 (1.6)<br>4.0-9.7      | 9.4 (3.3)<br>4.0-14.3     | 14.6 (0.1)<br>14.2-14.7    |
| Mean exposure level since inclusion*<br>in mg/m <sup>3</sup>       | <i>mean (sd)</i><br><i>min-max</i> | 1.0 (0.9)<br>0.1 – 4.7    | 1.8 (2.0)<br>0.1-13.8      | 1.6 (0.9)<br>0.1-4.3       | 0.6 (0.3)<br>0.2-1.7      | 0.8 (0.6)<br>0.2-4.1      | 0.9 (0.4)<br>0.2-1.6       |

\*computed for the subjects for which each given endpoint had been obtained at least twice.

Table C Main health outcomes in categories of total cumulative exposure

| Total cumulative exposure in<br>years.mg/m <sup>3</sup> |              | 0 – 20      | 20 – 50     | 50 – 150    | 150 +         |
|---------------------------------------------------------|--------------|-------------|-------------|-------------|---------------|
| <i>Lung function test</i>                               | <i>n</i>     | 530         | 340         | 373         | 168           |
| FEV <sub>1</sub> * (n=1421)                             | mean (sd)    | 0.22 (0.93) | 0.15 (0.95) | 0.05 (1.03) | - 0.07 (0.99) |
| FVC* (n=1421)                                           | mean (sd)    | 0.13 (0.86) | 0.03 (0.90) | 0.03 (0.84) | - 0.19 (0.89) |
| FEV <sub>1</sub> / FVC* (n=1421)                        | mean (sd)    | 0.56 (0.85) | 0.58 (0.74) | 0.44 (1.11) | 0.58 (0.96)   |
| <i>Radiology †</i>                                      | <i>n</i>     | 499         | 258         | 270         | 126           |
| <i>Small radiological opacities</i>                     |              | 34 (6.8%)   | 27 (10.5%)  | 41 (15.2%)  | 29 (23.0%)    |
| 0/1                                                     | n (%)        | 22 (4.4%)   | 23 (8.9%)   | 29 (10.7%)  | 17 (13.5%)    |
| 1/0                                                     | n (%)        | 7 (1.4%)    | 3 (1.2%)    | 9 (3.3%)    | 9 (7.1%)      |
| 1/1 +                                                   | n (%)        | 5 (1.0%)    | 1 (0.4%)    | 3 (1.1%)    | 3 (2.4%)      |
| <i>Pleural anomalies</i>                                | <i>n (%)</i> | 5 (1.2%)    | 2 (0.8%)    | 8 (3.0%)    | 4 (3.2%)      |
| Unilateral plaques                                      | n (%)        | 3 (0.6%)    | -           | 6 (2.2%)    | 1 (0.8%)      |
| Bilateral plaques                                       | n (%)        | -           | -           | 1 (0.4%)    | 1 (0.8%)      |
| Other                                                   | n (%)        | 2 (0.5%)    | 2 (0.8%)    | 1 (0.4%)    | 2 (1.7%)      |
| <i>Respiratory symptoms</i>                             | <i>n</i>     |             |             |             |               |
| Chronic bronchitis                                      | n (%)        | 3 (1.4%)    | 1 (0.6%)    | 10 (5.0%)   | 3 (2.7%)      |
| Usual cough and/or phlegm                               | n (%)        | 17 (8.1%)   | 32 (18.8%)  | 43 (21.6%)  | 22 (20.0%)    |
| Dyspnoea                                                | n (%)        | 2 (1.0%)    | 4 (2.4%)    | 9 (4.5%)    | 6 (5.5%)      |

\* in standardized residuals i.e. (observed – predicted)/residual standard deviation according to the prediction equations of the European Respiratory Society

† This descriptive table enumerates all 1153 X-rays, in contrast to the 1054 X-rays from males

Table D Main health outcomes in categories of cumulative exposure since inclusion

| Cumulative exposure in years.mg/m <sup>3</sup> since inclusion |           | 0-1         | 1-5         | 5-10        | 10-20        | 20 +          |
|----------------------------------------------------------------|-----------|-------------|-------------|-------------|--------------|---------------|
| <i>Lung function test</i>                                      |           |             |             |             |              |               |
|                                                                | <i>n</i>  | 509         | 410         | 198         | 199          | 105           |
| FEV <sub>1</sub> * (n=1421)                                    | mean (sd) | 0.23 (1.02) | 0.01 (0.95) | 0.04 (1.13) | 0.12 (0.90)  | 0.28 (0.84)   |
| FVC* (n=1421)                                                  | mean (sd) | 0.10 (0.90) | 0.01 (0.82) | 0.14 (0.92) | -0.02 (0.87) | - 0.03 (0.87) |
| FEV <sub>1</sub> / FVC* (n=1421)                               | mean (sd) | 0.64 (0.87) | 0.51 (0.91) | 0.48 (0.74) | 0.47 (0.85)  | 0.54 (1.22)   |
| <i>Radiology†</i>                                              |           |             |             |             |              |               |
|                                                                | <i>n</i>  | 399         | 220         | 111         | 154          | 269           |
| <i>Small radiological opacities</i>                            |           | 53 (13.3%)  | 19 (8.6%)   | 15 (13.5%)  | 18 (11.7%)   | 26 (9.7%)     |
| 0/1                                                            | n (%)     | 36 (9.0%)   | 11 (5.0%)   | 11 (9.9%)   | 11 (7.4%)    | 22 (8.2%)     |
| 1/0                                                            | n (%)     | 12 (3.0%)   | 5 (2.3%)    | 2 (1.8%)    | 6 (3.9%)     | 3 (1.1%)      |
| 1/1 +                                                          | n (%)     | 5 (1.3%)    | 3 (1.4%)    | 2 (1.8%)    | 1 (0.7%)     | 1 (0.4 %)     |
| <i>Pleural anomalies</i>                                       |           | 6 (1.5%)    | 2 (0.9%)    | 2 (1.8%)    | 3 (2.0%)     | 6 (1.9%)      |
| Unilateral plaques                                             | n (%)     | 2 (0.5%)    | -           | 1 (0.9%)    | 2 (1.3%)     | 5 (1.9%)      |
| Bilateral plaques                                              | n (%)     | 1 (0.3%)    | -           | -           | -            | 1 (0.4%)      |
| Other                                                          | n (%)     | 3 (0.8%)    | 2 (0.9%)    | 1 (0.9%)    | 1 (0.7%)     | -             |
| <i>Respiratory symptoms</i>                                    |           |             |             |             |              |               |
| Chronic bronchitis                                             | n (%)     | 12 (3.1%)   | -           | 1 (1.1%)    | 4 (4.4%)     | -             |
| Usual cough and/or phlegm                                      | n (%)     | 61 (15.7%)  | 7 (13.2%)   | 11 (12.1%)  | 20 (22.0%)   | 15 (23.1%)    |
| Dyspnoea                                                       | n (%)     | 10 (2.6%)   | 2 (3.8%)    | 1 (1.1%)    | 4 (4.4%)     | 4 (6.2%)      |

\* in standardized residuals i.e. (observed –predicted)/residual standard deviation according to the prediction equations of the European Respiratory Society

† This descriptive table enumerates all 1153 X-rays, in contrast to the 1054 X-rays from males

Table E : Random effect linear regression models of the lung function parameters as a function of confounders and cumulative exposure variables lagged by 5 years.

|                                                                                                                  | FEV <sub>1</sub> (mL)*<br>(n‡ = 1368) |                         | FVC (mL)†<br>(n‡ = 1368) |                         | FEV <sub>1</sub> / FVC (%)<br>(n‡ = 1368) |                         |
|------------------------------------------------------------------------------------------------------------------|---------------------------------------|-------------------------|--------------------------|-------------------------|-------------------------------------------|-------------------------|
|                                                                                                                  | Regression coefficient                | 95% confidence interval | Regression coefficient   | 95% confidence interval | Regression coefficient                    | 95% confidence interval |
| Regression model including confounders§ and total estimated cumulative exposure                                  |                                       |                         |                          |                         |                                           |                         |
| Pack-years                                                                                                       | -6.06                                 | -9.44,-2.72             | -3.79                    | -7.48,-0.10             | -0.072                                    | -0.115,-0.028           |
| Total lagged cumulative exposure by 10 years.mg/m <sup>3</sup>                                                   | -6.01                                 | -13.08, -1.06           | -5.64                    | -13.32,2.03             | -0.019                                    | -0.109,0.070            |
| Regression model including confounders, cumulative exposure at inclusion and cumulative exposure since inclusion |                                       |                         |                          |                         |                                           |                         |
| Pack-years                                                                                                       | -6.15                                 | -9.52,-2.79             | -3.89                    | -7.59 , -0.20           | -0.115                                    | -0.117,-0.028           |
| Initial lagged cumulative exposure by 10 years.mg/m <sup>3</sup>                                                 | -7.78                                 | -15.80, 0.34            | -8.53                    | -17.22 , 0.15           | -0.014                                    | -0.096,0.087            |
| Lagged cumulative exposure since inclusion by 10 years.mg/m <sup>3</sup>                                         | 0.18                                  | -15.48,15.84            | 6.06                     | -12.22,24.35            | -0.044                                    | -0.268,0.181            |

\* FEV<sub>1</sub> : forced expiratory volume in one second

† FVC: forced vital capacity

‡ n : number of valid measurements

§ The confounders are, in addition to pack-years, the type of apparatus, sex, sex-specific age and height and medical histories

Table F : Population-averaged logistic regression models of the prevalence of small radiological opacities and pleural shadows as a function of confounders and cumulative exposure variables lagged by 5 years in the combined male study population

|                                                                                                        | Profusion $\geq 0/1$ |                         | Profusion $\geq 1/0$ |                         | Pleural abnormalities* |                         |
|--------------------------------------------------------------------------------------------------------|----------------------|-------------------------|----------------------|-------------------------|------------------------|-------------------------|
| Number of positive radiographs (% of 1,054†)                                                           | 131 (12.4%)          |                         | 40 (3.8%)            |                         | 19 (1.8%)              |                         |
| Number of subjects with at least one positive finding (% of 343‡)                                      | 93 (27.1%)           |                         | 31 (9.0%)            |                         | 16 (4.9%)              |                         |
|                                                                                                        | Odds Ratio           | 95% confidence interval | Odds Ratio           | 95% confidence interval | Odds Ratio             | 95% confidence interval |
| Logistic regression model including confounders§ and total estimated cumulative exposure               |                      |                         |                      |                         |                        |                         |
| Smoker                                                                                                 | 1.68                 | 1.10, 2.57              | 1.84                 | 0.87, 3.87              | -                      | -                       |
| Obesity¶                                                                                               | -                    | -                       | -                    | -                       | 3.87                   | 1.20, 12.4              |
| Austrian site                                                                                          | 1.80                 | 1.11, 2.91              | 1.50                 | 0.61, 3.68              | 3.13                   | 1.11, 8.85              |
| Total lagged cumulative exposure by 10 years.mg/m <sup>3</sup>                                         | 1.046                | 1.021, 1.073            | 1.057                | 1.024, 1.091            | 1.059                  | 1.002,1.126             |
| Logistic regression model including confounders§, cumulative exposure at inclusion and since inclusion |                      |                         |                      |                         |                        |                         |
| Smoker                                                                                                 | 1.56                 | 1.11, 2.40              | 1.68                 | 0.78, 3.60              |                        |                         |
| Obesity                                                                                                | -                    | -                       | -                    | -                       | 3.88                   | 1.32, 11.42             |
| Austrian site                                                                                          | 1.66                 | 1.02, 2.68              | 1.36                 | 0.551, 3.352            | 3.11                   | 1.09, 8.90              |
| Initial lagged cumulative exposure by 10 years.mg/m <sup>3</sup>                                       | 1.081                | 1.043, 1.120            | 1.089                | 1.048, 1.132            | 1.060                  | 0.948, 1.119            |
| Lagged cumulative exposure since inclusion by 10 years.mg/m <sup>3</sup>                               | 0.967                | 0.913, 1.023            | 0.960                | 0.885, 1.041            | 1.056                  | 0.950, 1.173            |

\* Defined as any pleural abnormality on the X-ray not infirmed by a later high –resolution computed tomography

† Number of radiographies obtained in the male study population

‡ Number of male subjects with at least one radiography

§ The confounders are smoking and site (for small opacities) or obesity and site (for pleural shadows)

¶ Obesity is defined as a body mass index greater than 30 kg/m<sup>2</sup>.
